# Supplementary material for: Mechanical Signals Inhibit Growth of a Grafted Tumor In Vivo: Proof of Concept
Source: PLOS journal article supplement (doi:10.1371/journal.pone.0152885), 2016-04-21

# S3 Appendix: Link between mice number and tumor number

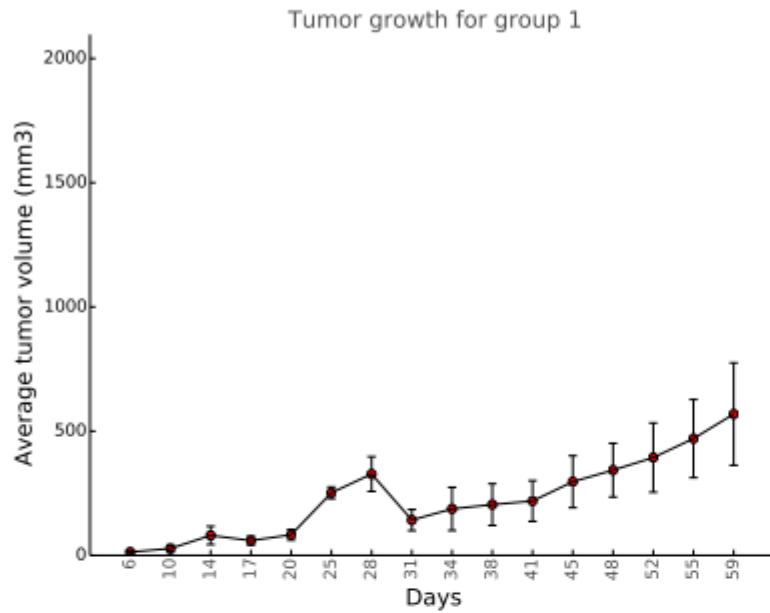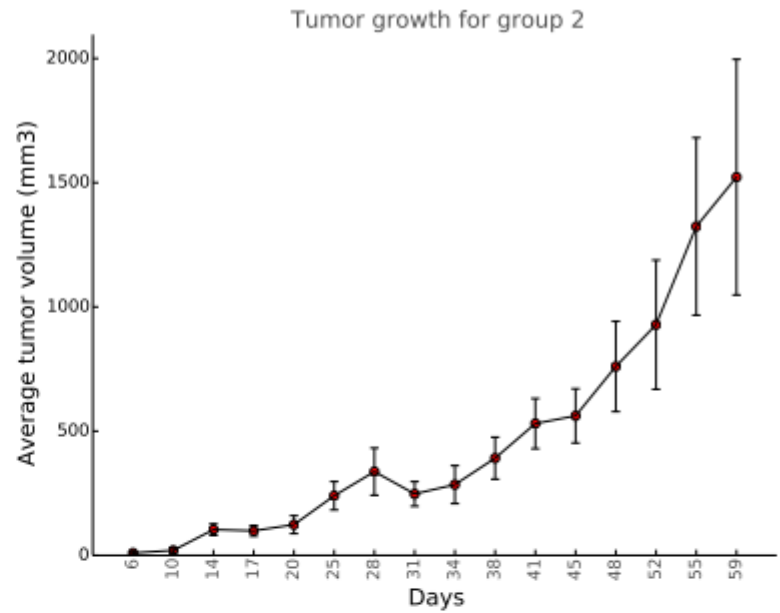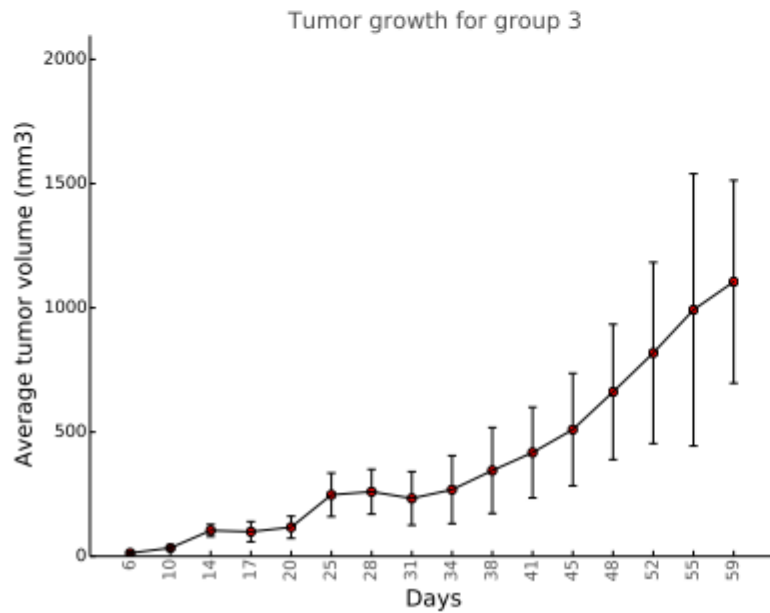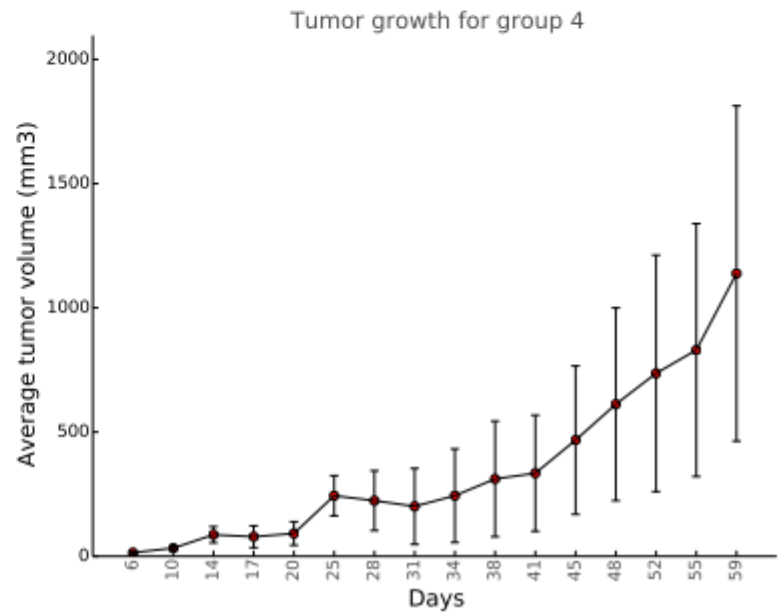

Supplement: S3 (10.1371/journal.pone.0152885.s003) [file journal.pone.0152885.s003]
